# Supplementary material for: Active nematics
Source: PubMed Central journal article supplement (PMC6104062; doi:10.1038/s41467-018-05666-8), 2018-08-21
Supplement: 41467_2018_5666_MOESM1_ESM.pdf [file 41467_2018_5666_MOESM1_ESM.pdf]

## **Description of Additional Supplementary Files**

File Name: Supplementary Movie 1

Description: Active turbulence and active topological defects in a microtubule/kinesin motor mixture.
